# Supplementary material for: Application of Inductively Coupled Plasma Spectrometric Techniques and Multivariate Statistical Analysis in the Hydrogeochemical Profiling of Caves—Case Study Cloșani, Romania
Source: MDPI journal article supplement (doi:10.3390/molecules26226788), 2021-11-10
Supplement: s1 [file s1]

# Application of Inductively Coupled Plasma Spectrometric Techniques and Multivariate Statistical Analysis in the Hydrogeochemical Profiling of Caves—Case Study Cloșani, Romania

Anamaria Iulia Torok<sup>1</sup>, Erika Andrea Levei<sup>1</sup>, Silviu Constantin<sup>2,3,4</sup>, Oana Teodora Moldovan<sup>3,4,5</sup>, Marin Senila<sup>1</sup>, Oana Cadar<sup>1</sup>, Dorina Casoni<sup>6,7</sup>, Simion Bogdan Angyus<sup>1,6,7</sup>, Claudiu Tanaselia<sup>1</sup>, Eniko Covaci<sup>6,7</sup> and Tiberiu Frentiu<sup>6,7\*</sup>

- <sup>1</sup> INCDO–INOE 2000 National Institute for Research and Development of Optoelectronics,, Research Institute for Analytical Instrumentation subsidiary, Donath 67, 400293 Cluj-Napoca, Romania; [iulia.torok@icia.ro](mailto:iulia.torok@icia.ro) (A.I.T.); [erika.levei@icia.ro](mailto:erika.levei@icia.ro) (E.A.L.); [marin.senila@icia.ro](mailto:marin.senila@icia.ro) (M.S.); [oana.cadar@icia.ro](mailto:oana.cadar@icia.ro) (O.C.); [bogdan.angyus@gmail.com](mailto:bogdan.angyus@gmail.com) (S.B.A.); [claudiu.tanaselia@icia.ro](mailto:claudiu.tanaselia@icia.ro) (C.T.);
- <sup>2</sup> Department of Geospeleology and Paleontology, Emil Racovita Institute of Speleology, Calea 13 Septembrie, 050711 Bucharest, Romania; [silviu.constantin@iser.ro](mailto:silviu.constantin@iser.ro)
- <sup>3</sup> Romanian Institute of Science and Technology, Saturn 24-26, 400504 Cluj-Napoca, Romania
- <sup>4</sup> Centro Nacional de Investigación sobre la Evolución Humana, Paseo Sierra de Atapuerca 3, 09002 Burgos, Spain
- <sup>5</sup> Department of Cluj-Napoca, Emil Racovita Institute of Speleology, Cluj Department, Clinicilor 5, 400006 Cluj-Napoca, Romania; [oanamol35@gmail.com](mailto:oanamol35@gmail.com)
- <sup>6</sup> Department of Chemistry, Faculty of Chemistry and Chemical Engineering, Babes-Bolyai University, Arany Janos 11, 400028 Cluj-Napoca, Romania; [dorina.casoni@ubbcluj.ro](mailto:dorina.casoni@ubbcluj.ro) (D.C.); [eniko.covaci@ubbcluj.ro](mailto:eniko.covaci@ubbcluj.ro) (E.C.); [tiberiu.frentiu@ubbcluj.ro](mailto:tiberiu.frentiu@ubbcluj.ro) (T.F.);
- <sup>7</sup> Research Center for Advanced Chemical Analysis, Instrumentation and Chemometrics–Analytica, Babes-Bolyai University, Arany Janos 11, 400028 Cluj-Napoca, Romania
- \* Correspondence: [tiberiu.frentiu@ubbcluj.ro](mailto:tiberiu.frentiu@ubbcluj.ro) (T.F.); Tel.: +40-264-593833

This online resource contains the following data:

1. Operating conditions for OPTIMA 5300 DV ICP–OES Perkin Elmer spectrometer for Al, Na, K, Ca, Mg, P, S and Fe determination in water and silty soil samples (Table S1)
2. Operating conditions for ELAN DRCII Perkin Elmer ICP–MS spectrometer for multielemental determination in water and silty soil samples (Table S2)
3. Limits of detection for multielemental determination by ICP–OES (Table S3)
4. Limits of detection for multielemental determination by ICP–MS (Table S4)
5. Validation of ICP–OES and ICP–MS methods for multielemental determination in water, soil and sediments (Tables S5–S8)
6. Operating conditions for 761 Compact IC Metrohm ion chromatograph (Table S9);
7. Limits of detection for anions determination in water by ion chromatography (Table S10)
8. Relationship between major ions in water samples collected from Cloșani Cave considering all samples (a)  $\text{Ca}^{2+} - \text{Cl}^-$ ; (b)  $\text{Ca}^{2+} - \text{HCO}_3^-$ ; (c)  $\text{Ca}^{2+} - \text{SO}_4^{2-}$ ; (d)  $\text{Mg}^{2+} - \text{Cl}^-$ ; (e)  $\text{Mg}^{2+} - \text{HCO}_3^-$ ; (f)  $\text{Mg}^{2+} - \text{SO}_4^{2-}$ ; (g)  $\text{Na}^+ - \text{Cl}^-$ ; (h)  $\text{Na}^+ - \text{HCO}_3^-$ ; (i)  $\text{Na}^+ - \text{SO}_4^{2-}$ ; (j)  $\text{K}^+ - \text{Cl}^-$ ; (k)  $\text{K}^+ - \text{HCO}_3^-$ ; (l)  $\text{K}^+ - \text{SO}_4^{2-}$ . C2 and C3 – sampling points.
9. Relationship between major ions in water samples collected from Cloșani Cave after the elimination of outliers caused by the seasonal variability (a)  $\text{Ca}^{2+} - \text{Cl}^-$ ; (b)  $\text{Ca}^{2+} - \text{HCO}_3^-$ ; (c)  $\text{Ca}^{2+} - \text{SO}_4^{2-}$ ; (d)  $\text{Mg}^{2+} - \text{Cl}^-$ ; (e)  $\text{Mg}^{2+} - \text{HCO}_3^-$ ; (f)  $\text{Mg}^{2+} - \text{SO}_4^{2-}$ ; (g)  $\text{Na}^+ - \text{Cl}^-$ ; (h)  $\text{Na}^+ - \text{HCO}_3^-$ ; (i)  $\text{Na}^+ - \text{SO}_4^{2-}$ ; (j)  $\text{K}^+ - \text{Cl}^-$ ; (k)  $\text{K}^+ - \text{HCO}_3^-$ ; (l)  $\text{K}^+ - \text{SO}_4^{2-}$ . C2 and C3 – sampling points.

## 1. Operating conditions for ICP–OES

**Table S1.** Operating conditions for OPTIMA 5300 DV ICP-OES Perkin Elmer spectrometer for Al, Na, K, Ca, Mg, P, S and Fe determination in water and silty soil samples

| Parameter                                   | Settings                                                                                     |
|---------------------------------------------|----------------------------------------------------------------------------------------------|
| Plasma power (W)                            | 1300                                                                                         |
| Ar flow rate (L min <sup>-1</sup> )         |                                                                                              |
| - Plasma support                            | 15                                                                                           |
| - Auxiliary gas                             | 2.0                                                                                          |
| - Nebulizer gas                             | 0.8                                                                                          |
| Plasma viewing                              | Axial viewing for Al, Na, K, Ca, Mg, P and S and radial viewing for Fe.                      |
| Sample introduction (mL min <sup>-1</sup> ) | 1.5                                                                                          |
| Calibration range (mg L <sup>-1</sup> )     | 0–20 (n = 7 points linear calibration curve)                                                 |
| Wavelength (nm)                             | Al 396.152; Na 589.592; K 766.490; Mg 285.213; Ca 317.933; P 213.618; S 180.731; Fe 238.204. |

## 2. Operating conditions for ICP-MS

**Table S2.** Operating conditions for ELAN DRCII Perkin Elmer ICP–MS spectrometer for multielemental determination in water and silty soil samples

| Parameter                           | Settings                                                                                                                                                                                                                                                                                                                                                                                                                                                                                                                                                                                                                                                                                                                                                                                                                                                                                                                                                                                                                                                                                                                                                                                                                                                                               |
|-------------------------------------|----------------------------------------------------------------------------------------------------------------------------------------------------------------------------------------------------------------------------------------------------------------------------------------------------------------------------------------------------------------------------------------------------------------------------------------------------------------------------------------------------------------------------------------------------------------------------------------------------------------------------------------------------------------------------------------------------------------------------------------------------------------------------------------------------------------------------------------------------------------------------------------------------------------------------------------------------------------------------------------------------------------------------------------------------------------------------------------------------------------------------------------------------------------------------------------------------------------------------------------------------------------------------------------|
| Plasma power (W)                    | 1400                                                                                                                                                                                                                                                                                                                                                                                                                                                                                                                                                                                                                                                                                                                                                                                                                                                                                                                                                                                                                                                                                                                                                                                                                                                                                   |
| Ar flow rate (L min <sup>-1</sup> ) |                                                                                                                                                                                                                                                                                                                                                                                                                                                                                                                                                                                                                                                                                                                                                                                                                                                                                                                                                                                                                                                                                                                                                                                                                                                                                        |
| - Plasma support                    | 15                                                                                                                                                                                                                                                                                                                                                                                                                                                                                                                                                                                                                                                                                                                                                                                                                                                                                                                                                                                                                                                                                                                                                                                                                                                                                     |
| - Auxiliary gas                     | 1.2                                                                                                                                                                                                                                                                                                                                                                                                                                                                                                                                                                                                                                                                                                                                                                                                                                                                                                                                                                                                                                                                                                                                                                                                                                                                                    |
| - Nebulizer gas                     | 0.96                                                                                                                                                                                                                                                                                                                                                                                                                                                                                                                                                                                                                                                                                                                                                                                                                                                                                                                                                                                                                                                                                                                                                                                                                                                                                   |
| Analog stage voltage (V)            | –1850                                                                                                                                                                                                                                                                                                                                                                                                                                                                                                                                                                                                                                                                                                                                                                                                                                                                                                                                                                                                                                                                                                                                                                                                                                                                                  |
| Pulse stage voltage (V)             | 1050                                                                                                                                                                                                                                                                                                                                                                                                                                                                                                                                                                                                                                                                                                                                                                                                                                                                                                                                                                                                                                                                                                                                                                                                                                                                                   |
| Scan Mode                           | Peak Hopping                                                                                                                                                                                                                                                                                                                                                                                                                                                                                                                                                                                                                                                                                                                                                                                                                                                                                                                                                                                                                                                                                                                                                                                                                                                                           |
| Dwell Time per Amu (ms)             | 200                                                                                                                                                                                                                                                                                                                                                                                                                                                                                                                                                                                                                                                                                                                                                                                                                                                                                                                                                                                                                                                                                                                                                                                                                                                                                    |
| Integration Time (ms)               | 4000                                                                                                                                                                                                                                                                                                                                                                                                                                                                                                                                                                                                                                                                                                                                                                                                                                                                                                                                                                                                                                                                                                                                                                                                                                                                                   |
| Detector                            | Analog                                                                                                                                                                                                                                                                                                                                                                                                                                                                                                                                                                                                                                                                                                                                                                                                                                                                                                                                                                                                                                                                                                                                                                                                                                                                                 |
| Isotopes and DRC operation          | Without DRC (Rpq = 0.25, reaction gas absent): <sup>7</sup> Li, <sup>9</sup> Be, <sup>45</sup> Sc, <sup>51</sup> V, <sup>52</sup> Cr, <sup>55</sup> Mn, <sup>59</sup> Co, <sup>60</sup> Ni, <sup>63</sup> Cu, <sup>66</sup> Zn, <sup>85</sup> Rb, <sup>88</sup> Sr, <sup>89</sup> Y, <sup>90</sup> Zr, <sup>111</sup> Cd, <sup>208</sup> Pb, <sup>118</sup> Sn, <sup>121</sup> Sb, <sup>133</sup> Cs, <sup>184</sup> W, <sup>205</sup> Tl, <sup>232</sup> Th, <sup>69</sup> Ga, <sup>139</sup> La, <sup>140</sup> Ce, <sup>141</sup> Pr, <sup>153</sup> Eu, <sup>159</sup> Tb, <sup>165</sup> Ho, <sup>166</sup> Er, <sup>175</sup> Lu, <sup>178</sup> Hf<br>Without DRC (Rpq = 0.25, reaction gas absent) default mathematical modelling isobaric interference: <sup>98</sup> Mo (- 0.109613 × <sup>101</sup> Ru); <sup>138</sup> Ba (- 0.000901 × <sup>139</sup> La); <sup>142</sup> Nd (- 0.125653 × <sup>140</sup> Ce); <sup>152</sup> Sm (- 0.012780 × <sup>157</sup> Gd); <sup>158</sup> Gd (- 0.004016 × <sup>163</sup> Dy); <sup>164</sup> Dy (- 0.047902 × <sup>166</sup> Er); <sup>174</sup> Yb (- 0.005865 × <sup>178</sup> Hf)<br>With DRC (RPq = 0.45; O <sub>2</sub> reaction gas flow rate 0.4 mL min <sup>-1</sup> ): ( <sup>75</sup> As <sup>16</sup> O) <sup>+</sup> |
| Isotopic internal standard          | No                                                                                                                                                                                                                                                                                                                                                                                                                                                                                                                                                                                                                                                                                                                                                                                                                                                                                                                                                                                                                                                                                                                                                                                                                                                                                     |

### 3. Limits of detection for multielemental determination by ICP-OES

**Table S3.** Limits of detection for multielemental determination by ICP–OES

| Element | Wavelength (nm) | Plasma viewing | LOD                            |                                                 |
|---------|-----------------|----------------|--------------------------------|-------------------------------------------------|
|         |                 |                | Water ( $\mu\text{g L}^{-1}$ ) | Silty soil ( $\text{mg kg}^{-1}$ ) <sup>1</sup> |
| Na      | 589.592         | Axial          | 8                              | 0.27                                            |
| K       | 766.490         | Axial          | 3                              | 0.10                                            |
| Mg      | 285.213         | Axial          | 9                              | 0.30                                            |
| Ca      | 317.933         | Axial          | 4                              | 0.13                                            |
| Al      | 396.152         | Axial          | 2                              | 0.07                                            |
| P       | 213.618         | Axial          | 50                             | 1.67                                            |
| S       | 180.731         | Axial          | 50                             | 1.67                                            |
| Fe      | 238.204         | Radial         | 8                              | 0.27                                            |

<sup>1</sup> Limits of detection in solid calculated for 3 g digested sample made up to 100 mL.

#### 4. Limits of detection for multielemental determination by ICP–MS

**Table S4.** Limits of detection for multielemental determination by ICP–MS

| Element         | Isotope                          | LOD                            |                                                 |
|-----------------|----------------------------------|--------------------------------|-------------------------------------------------|
|                 |                                  | Water ( $\mu\text{g L}^{-1}$ ) | Silty soil ( $\text{mg kg}^{-1}$ ) <sup>1</sup> |
| Li              | <sup>7</sup> Li                  | 0.16                           | 0.005                                           |
| Be              | <sup>9</sup> Be                  | 0.28                           | 0.009                                           |
| Sc              | <sup>45</sup> Sc                 | 0.13                           | 0.004                                           |
| V               | <sup>51</sup> V                  | 0.16                           | 0.005                                           |
| Cr              | <sup>52</sup> Cr                 | 0.22                           | 0.007                                           |
| Mn              | <sup>55</sup> Mn                 | 0.013                          | 0.001                                           |
| Co              | <sup>59</sup> Co                 | 0.15                           | 0.005                                           |
| Ni              | <sup>60</sup> Ni                 | 0.13                           | 0.005                                           |
| Cu              | <sup>63</sup> Cu                 | 0.21                           | 0.007                                           |
| Zn              | <sup>66</sup> Zn                 | 0.31                           | 0.010                                           |
| As <sup>2</sup> | <sup>75</sup> As <sup>16</sup> O | 0.27                           | 0.009                                           |
| Rb              | <sup>85</sup> Rb                 | 0.21                           | 0.007                                           |
| Sr              | <sup>88</sup> Sr                 | 0.10                           | 0.004                                           |
| Y               | <sup>89</sup> Y                  | 0.03                           | 0.001                                           |
| Zr              | <sup>90</sup> Zr                 | 0.06                           | 0.002                                           |
| Mo              | <sup>98</sup> Mo                 | 0.15                           | 0.005                                           |
| Cd              | <sup>111</sup> Cd                | 0.07                           | 0.002                                           |
| Pb              | <sup>208</sup> Pb                | 0.11                           | 0.004                                           |
| Sn              | <sup>118</sup> Sn                | 0.06                           | 0.002                                           |
| Sb              | <sup>121</sup> Sb                | 0.05                           | 0.002                                           |
| Ba              | <sup>138</sup> Ba                | 0.16                           | 0.005                                           |
| Cs              | <sup>133</sup> Cs                | 0.61                           | 0.020                                           |
| W               | <sup>184</sup> W                 | 0.05                           | 0.0017                                          |
| Tl              | <sup>205</sup> Tl                | 0.49                           | 0.016                                           |
| Th              | <sup>232</sup> Th                | 0.57                           | 0.019                                           |
| Ga              | <sup>69</sup> Ga                 | 0.090                          | 0.003                                           |
| La              | <sup>139</sup> La                | 0.025                          | 0.0009                                          |
| Ce              | <sup>140</sup> Ce                | 0.030                          | 0.0010                                          |
| Pr              | <sup>141</sup> Pr                | 0.026                          | 0.0009                                          |
| Nd              | <sup>142</sup> Nd                | 0.050                          | 0.0016                                          |
| Sm              | <sup>152</sup> Sm                | 0.051                          | 0.0017                                          |
| Eu              | <sup>153</sup> Eu                | 0.031                          | 0.0010                                          |
| Gd              | <sup>158</sup> Gd                | 0.053                          | 0.0018                                          |
| Tb              | <sup>159</sup> Tb                | 0.025                          | 0.0008                                          |
| Dy              | <sup>164</sup> Dy                | 0.041                          | 0.0014                                          |
| Ho              | <sup>165</sup> Ho                | 0.023                          | 0.0008                                          |
| Er              | <sup>166</sup> Er                | 0.032                          | 0.0011                                          |
| Yb              | <sup>174</sup> Yb                | 0.030                          | 0.0010                                          |
| Lu              | <sup>175</sup> Lu                | 0.022                          | 0.0008                                          |
| Hf              | <sup>178</sup> Hf                | 0.022                          | 0.0008                                          |

<sup>1</sup> Limits of detection in solid calculated for 3 g digested sample made up to 100 mL.

<sup>2</sup> Arsenic determined by DRC–ICP–MS at <sup>75</sup>As<sup>16</sup>O<sup>+</sup> polyatomic ion (RPq = 0.45, O<sub>2</sub> reaction gas 0.4 mL min<sup>-1</sup>)

## 5. Validation of ICP–OES and ICP–MS methods for multielemental determination in water, soil and sediments

**Table S5.** Results ( $\mu\text{g L}^{-1}$ ,  $n = 3$ ) for the analysis of certified reference material SRM 1643f Trace Elements in Water by ICP–OES and ICP–MS methods

| Element        | Certified Value $\pm$ U <sup>1</sup> | Found Value $\pm$ C.I. <sup>2</sup> | Recovery $\pm$ C.I. (%) |
|----------------|--------------------------------------|-------------------------------------|-------------------------|
| <b>ICP-OES</b> |                                      |                                     |                         |
| Na             | 18830 $\pm$ 250                      | 18557 $\pm$ 725                     | 99 $\pm$ 4              |
| K              | 1932.6 $\pm$ 9.4                     | 1854.5 $\pm$ 83.5                   | 96 $\pm$ 5              |
| Ca             | 29430 $\pm$ 330                      | 28220 $\pm$ 1360                    | 96 $\pm$ 5              |
| Mg             | 7454 $\pm$ 60                        | 7288 $\pm$ 210                      | 98 $\pm$ 3              |
| Al             | 133.8 $\pm$ 1.2                      | 135.0 $\pm$ 3.7                     | 101 $\pm$ 3             |
| Fe             | 93.44 $\pm$ 0.78                     | 97.60 $\pm$ 2.93                    | 104 $\pm$ 3             |
| <b>ICP-MS</b>  |                                      |                                     |                         |
| Cr             | 18.50 $\pm$ 0.10                     | 19.50 $\pm$ 0.80                    | 105 $\pm$ 4             |
| Mn             | 37.14 $\pm$ 0.60                     | 37.10 $\pm$ 1.50                    | 100 $\pm$ 4             |
| Ni             | 59.8 $\pm$ 1.4                       | 52.8 $\pm$ 2.5                      | 88 $\pm$ 5              |
| Cu             | 21.66 $\pm$ 0.71                     | 21.70 $\pm$ 0.80                    | 100 $\pm$ 4             |
| Zn             | 74.4 $\pm$ 1.7                       | 72.4 $\pm$ 2.6                      | 97 $\pm$ 4              |
| Sr             | 314 $\pm$ 19                         | 344 $\pm$ 14                        | 110 $\pm$ 4             |
| Ba             | 518.2 $\pm$ 7.3                      | 588.0 $\pm$ 26.6                    | 113 $\pm$ 5             |
| Sb             | 55.45 $\pm$ 0.40                     | 58.25 $\pm$ 0.75                    | 105 $\pm$ 3             |

<sup>1</sup> U is the expanded uncertainty for 95% confidence level ( $k = 2$ ). <sup>2</sup> C.I. is the confidence interval for 95% confidence level ( $n = 3$ ).

**Table S6.** Results (mg kg<sup>-1</sup>, n = 3) for the analysis of soil and sediment CRMs by ICP–OES

| Element | CRM 048-50G                         |                                    | Metranal 32                           |                                    | NCS ZC 73006                        |                                    | GBW 07404                           |                                    | LRAC6625                            |                                    | Recovery<br>± C.I. (%) |
|---------|-------------------------------------|------------------------------------|---------------------------------------|------------------------------------|-------------------------------------|------------------------------------|-------------------------------------|------------------------------------|-------------------------------------|------------------------------------|------------------------|
|         | Trace Metals – Sand 1               |                                    | Light Sandy Soil                      |                                    | Soil                                |                                    | Soil                                |                                    | Loamy Clay                          |                                    |                        |
|         | Certified<br>Value ± U <sup>1</sup> | Found<br>Value ± C.I. <sup>2</sup> | Certified<br>Value ± U <sup>1,3</sup> | Found<br>Value ± C.I. <sup>2</sup> | Certified<br>Value ± U <sup>1</sup> | Found<br>Value ± C.I. <sup>2</sup> | Certified<br>Value ± U <sup>1</sup> | Found<br>Value ± C.I. <sup>2</sup> | Certified<br>Value ± U <sup>1</sup> | Found<br>Value ± C.I. <sup>2</sup> |                        |
| Na      | 8290 ± 266                          | 8140 ± 516                         | (10760)                               | 9650 ± 1190                        | 9350 ± 370                          | 8900 ± 740                         | 816 ± 148                           | 742 ± 148                          | 1417 ± 28                           | 1502 ± 101                         | 96 ± 12                |
| K       | 11400 ± 308                         | 11900 ± 988                        | (38580)                               | 36350 ± 2970                       | 17510 ± 300                         | 18920 ± 1190                       | 7640 ± 445                          | 7270 ± 668                         | 6087 ± 141                          | 6134 ± 332                         | 101 ± 8                |
| Ca      | 6410 ± 202                          | 6630 ± 330                         | (8900)                                | 9200 ± 1110                        | 11350 ± 300                         | 11000 ± 1040                       | 1930 ± 300                          | 1780 ± 370                         | 4272 ± 66                           | 4218 ± 84                          | 99 ± 12                |
| Mg      | 7030 ± 288                          | 6910 ± 620                         | (14100)                               | 12910 ± 1190                       | 13350 ± 450                         | 12830 ± 820                        | 3635 ± 370                          | 3264 ± 445                         | 1827 ± 43                           | 1979 ± 112                         | 95 ± 9                 |
| Fe      | 12300 ± 304                         | 11700 ± 711                        | (27970)                               | 26260 ± 2820                       | 47780 ± 520                         | 46370 ± 2450                       | 76400 ± 820                         | 74480 ± 5790                       | 12920 ± 290                         | 12550 ± 410                        | 96 ± 7                 |
| Al      | 12900 ± 1060                        | 12500 ± 1120                       | (104000)                              | 100600 ± 10460                     | 113500 ± 740                        | 116470 ± 8160                      | 173970 ± 1410                       | 148300 ± 16540                     | 11450 ± 620                         | 760 ± 100                          | 96 ± 9                 |
| P       | 288 ± 14.7                          | 275 ± 16.8                         | (2357)                                | 2240 ± 105                         | 560 ± 18                            | 553 ± 31                           | 695 ± 28                            | 724 ± 38                           | 294 ± 26                            | 304 ± 34                           | 99 ± 7                 |
| S       | -                                   | -                                  | -                                     | -                                  | 176 ± 22                            | 169 ± 18                           | 180 ± 36                            | 190 ± 23                           | -                                   | -                                  | 101 ± 11               |

<sup>1</sup> U is the expanded uncertainty for 95% confidence level (k = 2). <sup>2</sup> C.I. is the confidence interval for 95% confidence level (n = 3). <sup>3</sup> Indicative values

**Table S7.** Results (mg kg<sup>-1</sup>, n = 3) for the analysis of soil and sediment CRMs by ICP–MS

| Element | CRM 048-50G                         |                                    | Metranal 32                         |                                    | BCR-280R                            |                                    | NCS DC 78301                        |                                    | Recovery ±<br>C.I. (%) |
|---------|-------------------------------------|------------------------------------|-------------------------------------|------------------------------------|-------------------------------------|------------------------------------|-------------------------------------|------------------------------------|------------------------|
|         | Trace Metals – Sand 1               |                                    | Light Sandy Soil                    |                                    | Lake Sediment                       |                                    | River Sediment                      |                                    |                        |
|         | Certified<br>Value ± U <sup>1</sup> | Found Value<br>± C.I. <sup>2</sup> | Certified<br>Value ± U <sup>1</sup> | Found Value<br>± C.I. <sup>2</sup> | Certified<br>Value ± U <sup>1</sup> | Found Value<br>± C.I. <sup>2</sup> | Certified<br>Value ± U <sup>1</sup> | Found Value<br>± C.I. <sup>2</sup> |                        |
| V       | 101 ± 2.54                          | 100 ± 4.19                         | 44.6 ± 3.4                          | 41.3 ± 5.9                         | -                                   |                                    | (96) <sup>3</sup>                   | 98 ± 13                            | 98 ± 12                |
| Cr      | 239 ± 4.79                          | 231 ± 15.79                        | 147 ± 8                             | 162 ± 10                           | 126 ± 7                             | 119 ± 12                           | 90 ± 8                              | 56 ± 10                            | 91 ± 11                |
| Mn      | 1160 ± 37.9                         | 1083 ± 22.1                        | 531 ± 19                            | 592 ± 34                           | -                                   |                                    | 975 ± 34                            | 979 ± 149                          | 102 ± 9                |
| Co      | 177 ± 4.56                          | 172 ± 10.69                        | 11.1 ± 0.5                          | 11.5 ± 1.2                         | 16.8 ± 0.9                          | 17.0 ± 1.8                         | 16.5 ± 1.5                          | 15.9 ± 2.2                         | 100 ± 11               |
| Ni      | 100.00 ± 2.65                       | 95.30 ± 5.72                       | 40.1 ± 1.2                          | 41.3 ± 4.8                         | 69 ± 5                              | 70 ± 7                             | (32) <sup>3</sup>                   | 32 ± 4                             | 100 ± 10               |
| Cu      | 277 ± 6.03                          | 270 ± 5.83                         | 27.3 ± 0.7                          | 30.1 ± 1.7                         | 53 ± 6                              | 54 ± 6                             | 53 ± 6                              | 52 ± 7                             | 102 ± 9                |
| Zn      | 724 ± 21.2                          | 713.3 ± 11.2                       | 64 ± 1.5                            | 68.3 ± 5.9                         | 224 ± 25                            | 220 ± 23                           | (251) <sup>3</sup>                  | 246 ± 32                           | 100 ± 9                |
| As      | 123 ± 3.40                          | 121 ± 6.93                         | 26.1 ± 1.1                          | 29.5 ± 2.8                         | 33.4 ± 2.9                          | 32.1 ± 5.1                         | 56 ± 10                             | 55 ± 9                             | 101 ± 13               |
| Sb      | 139 ± 13.9                          | 145 ± 23.8                         | -                                   |                                    | -                                   |                                    | -                                   |                                    | 104 ± 16               |
| Sr      | 213 ± 9.77                          | 207 ± 13.16                        | -                                   |                                    | -                                   |                                    | -                                   |                                    | 97 ± 6                 |
| Cd      | 140 ± 3.28                          | 136 ± 7.87                         | 0.28 ± 0.03                         | 0.25 ± 0.05                        | 0.85 ± 0.10                         | 0.81 ± 0.11                        | 2.45 ± 0.3                          | 2.25 ± 0.3                         | 93 ± 14                |
| Pb      | 86.9 ± 2.42                         | 82.8 ± 5.40                        | 35.5 ± 0.9                          | 37.1 ± 2.5                         | -                                   |                                    | 79 ± 12                             | 78 ± 11                            | 100 ± 10               |
| Ba      | 235 ± 6.30                          | 222 ± 13.00                        | (99.1) <sup>3</sup>                 | 105.0 ± 7.9                        | -                                   |                                    | 375 ± 22                            | 384 ± 36                           | 101 ± 8                |
| Li      | 92.1 ± 12.2                         | 86.5 ± 6.1                         | -                                   |                                    | -                                   |                                    |                                     |                                    | 94 ± 7                 |
| Mo      | 138 ± 3.29                          | 127 ± 6.51                         | -                                   |                                    | -                                   |                                    |                                     |                                    | 92 ± 5                 |

<sup>1</sup> U is the expanded uncertainty for 95% confidence level (k = 2). <sup>2</sup> C.I. is the confidence interval for 95% confidence level (n = 3); <sup>3</sup> Indicative values

**Table S8.** Results (mg kg<sup>-1</sup>, n = 3) for the determination of several REEs in NCS ZC 73006 Soil Reference Material by ICP-MS

| Element | Certified Value ± U <sup>1</sup> | Found Value ± C.I. <sup>2</sup> | Recovery ± C.I. (%) |
|---------|----------------------------------|---------------------------------|---------------------|
| La      | 47 ± 2                           | 38 ± 3                          | 81 ± 8              |
| Ce      | 93 ± 4                           | 79 ± 6                          | 85 ± 8              |
| Pr      | 10.3 ± 0.8                       | 8.8 ± 0.7                       | 85 ± 8              |
| Nd      | 41 ± 2                           | 35 ± 3                          | 85 ± 9              |
| Sm      | 7.8 ± 0.3                        | 6.8 ± 0.5                       | 87 ± 7              |
| Eu      | 1.56 ± 0.06                      | 1.35 ± 0.10                     | 87 ± 7              |
| Gd      | 6.8 ± 0.5                        | 6.9 ± 0.5                       | 101 ± 7             |
| Tb      | 1.08 ± 0.07                      | 0.88 ± 0.06                     | 81 ± 7              |
| Dy      | 6.2 ± 0.4                        | 5.2 ± 0.3                       | 84 ± 6              |
| Ho      | 1.23 ± 0.07                      | 1.02 ± 0.05                     | 83 ± 5              |
| Er      | 3.4 ± 0.2                        | 3.6 ± 0.2                       | 106 ± 6             |
| Tm      | 0.53 ± 0.04                      | 0.52 ± 0.02                     | 98 ± 4              |
| Yb      | 3.5 ± 0.2                        | 3.0 ± 0.2                       | 86 ± 7              |
| Lu      | 0.54 ± 0.02                      | 0.44 ± 0.02                     | 81 ± 5              |

<sup>1</sup> U is the expanded uncertainty for 95% confidence level (k = 2); <sup>2</sup> C.I. is the confidence interval for 95% confidence level (n = 3).

## 6. Operating conditions for 761 Compact IC Metrohm ion chromatograph

**Table S9.** Operating conditions for 761 Compact IC Metrohm ion chromatograph for anions determination in water samples

|                       |                                                                                                                                                                                                   |
|-----------------------|---------------------------------------------------------------------------------------------------------------------------------------------------------------------------------------------------|
| Column                | Ion exchange METROSEP A Supp 5 – 100 / 4 (100 mm x 4 mm), Max. pressure 15 MPa, particle size 5 µm                                                                                                |
| Guard column          | METROSEP A Supp 5 Guard / 4 (50 mm x 4 mm), particle size 5 µm                                                                                                                                    |
| Mobile phase          | Na <sub>2</sub> CO <sub>3</sub> (0.0027 mol L <sup>-1</sup> )–NaHCO <sub>3</sub> (0.001 mol L <sup>-1</sup> ) buffer solution 0.7 mL min <sup>-1</sup>                                            |
| Detection             | Conductivity detector with chemical suppression                                                                                                                                                   |
| Injection loop volume | 20 µL                                                                                                                                                                                             |
| Quantification        | Peak area                                                                                                                                                                                         |
| Retention time        | F <sup>-</sup> - 2.548 min,<br>Cl <sup>-</sup> - 3.916 min<br>NO <sub>3</sub> <sup>-</sup> - 7.048 min<br>PO <sub>4</sub> <sup>3-</sup> - 8.693 min<br>SO <sub>4</sub> <sup>2-</sup> - 10.541 min |

## 7. Limits of detection for anions determination in water by ion chromatography

**Table S10.** Limits of detection for anions determination by ion chromatography

| Anion                         | LOD (mg L <sup>-1</sup> ) |
|-------------------------------|---------------------------|
| Cl <sup>-</sup>               | 0.004                     |
| NO <sub>3</sub> <sup>-</sup>  | 0.100                     |
| SO <sub>4</sub> <sup>2-</sup> | 0.010                     |
| NH <sub>4</sub> <sup>+</sup>  | 0.010                     |
| F <sup>-</sup>                | 0.010                     |
| PO <sub>4</sub> <sup>3-</sup> | 0.050                     |

## 8. Relationship between major ions in water samples collected from Cloșani Cave considering all samples

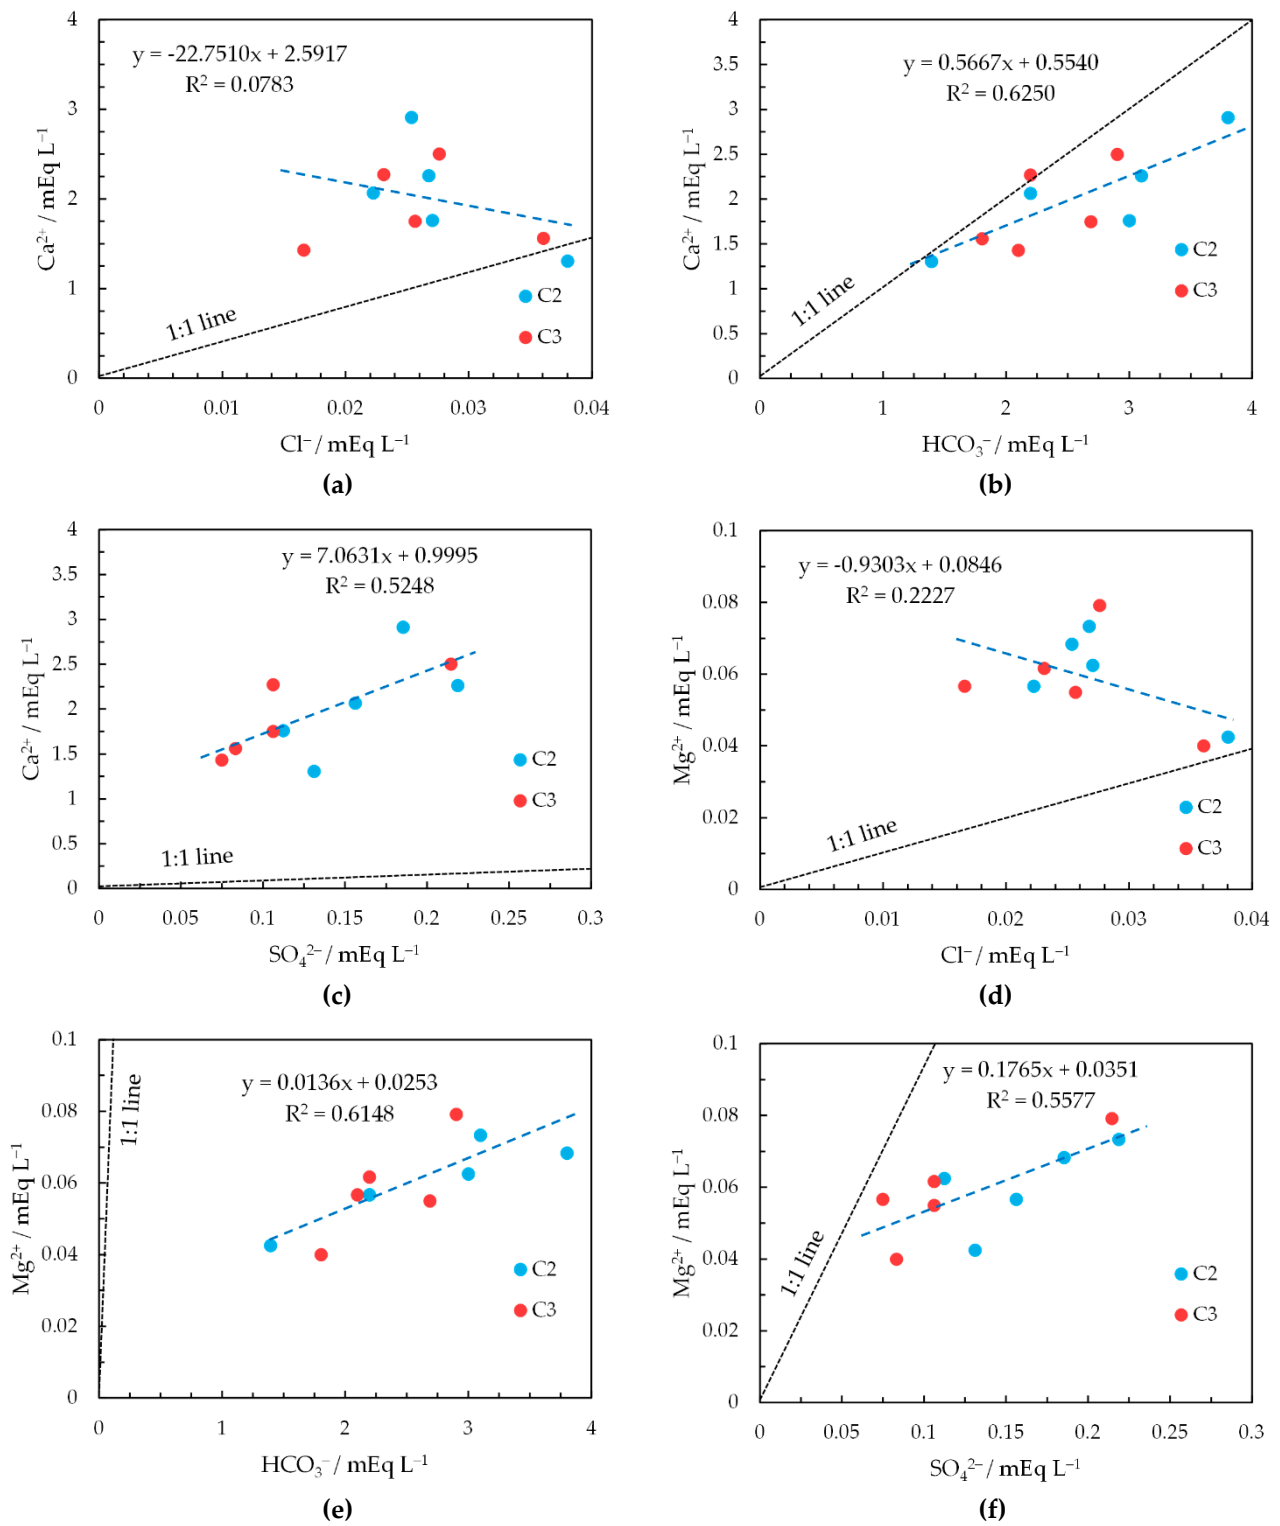



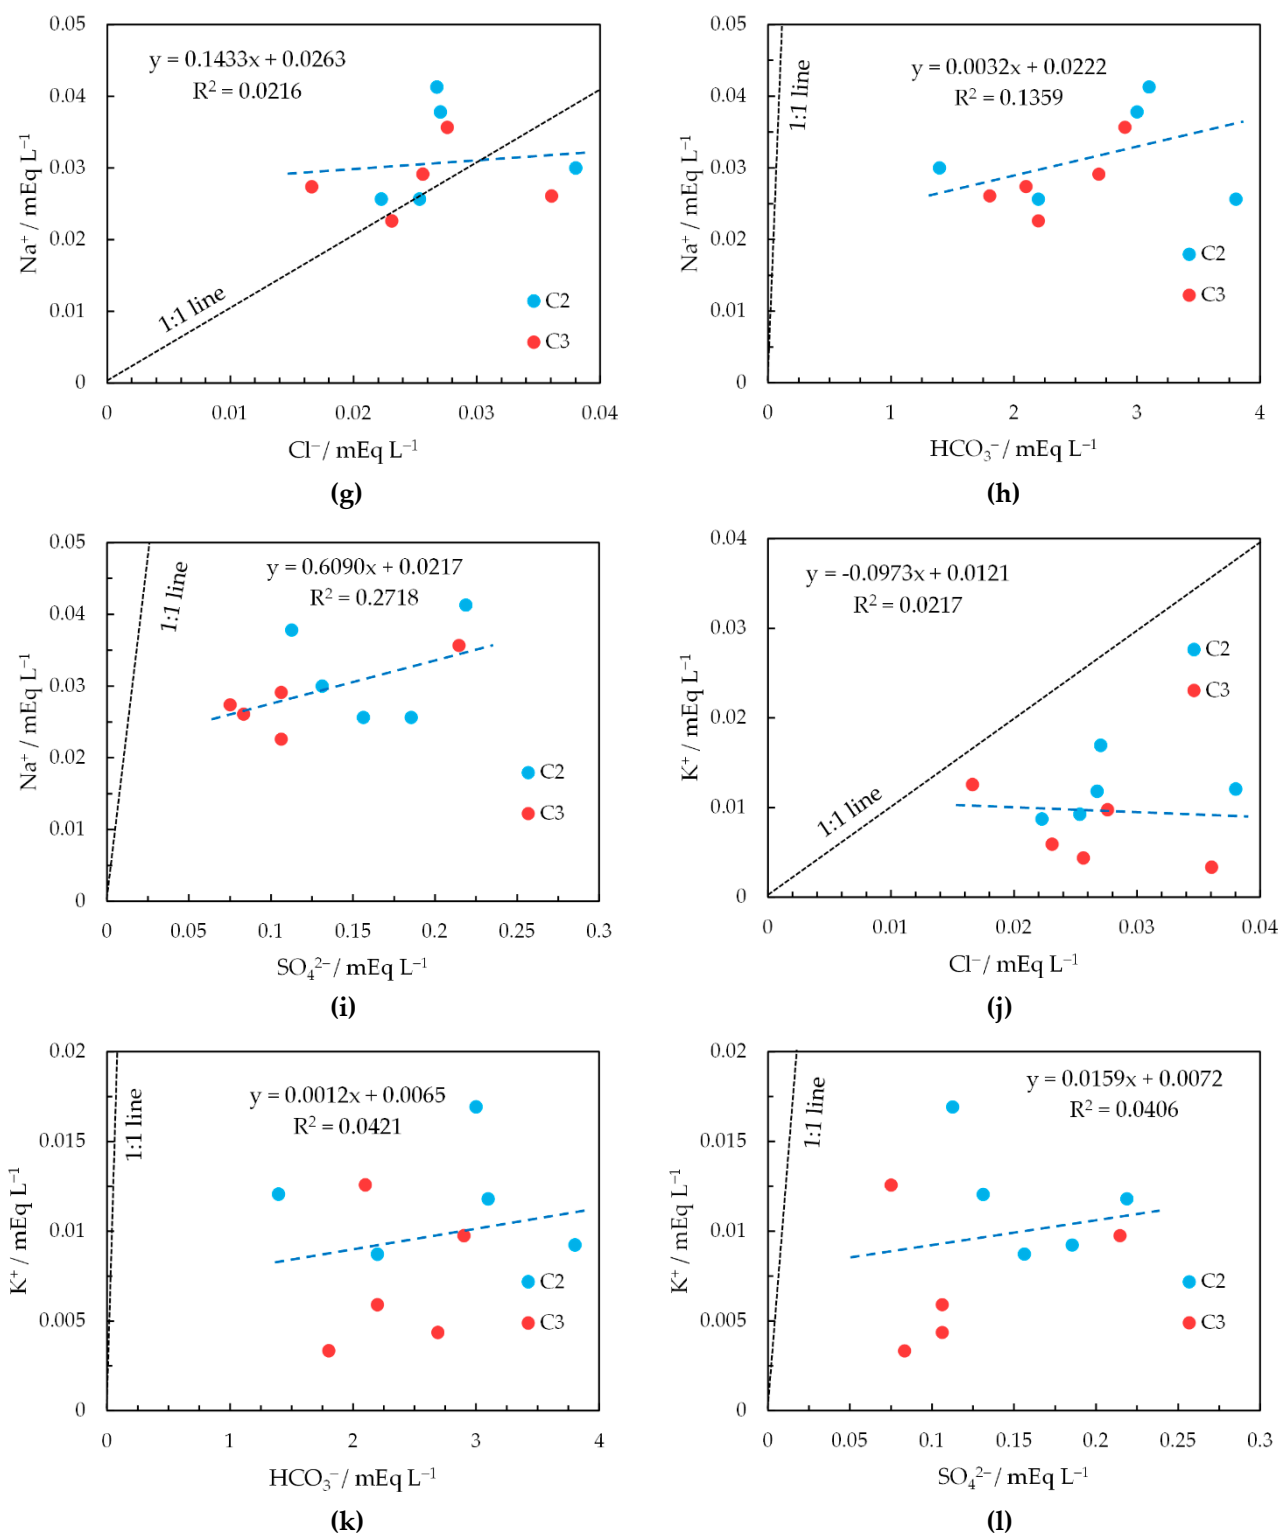

**Figure S1:** Relationship between major ions in water samples collected from Cloşani Cave considering all samples (a)  $\text{Ca}^{2+} - \text{Cl}^-$ ; (b)  $\text{Ca}^{2+} - \text{HCO}_3^-$ ; (c)  $\text{Ca}^{2+} - \text{SO}_4^{2-}$ ; (d)  $\text{Mg}^{2+} - \text{Cl}^-$ ; (e)  $\text{Mg}^{2+} - \text{HCO}_3^-$ ; (f)  $\text{Mg}^{2+} - \text{SO}_4^{2-}$ ; (g)  $\text{Na}^+ - \text{Cl}^-$ ; (h)  $\text{Na}^+ - \text{HCO}_3^-$ ; (i)  $\text{Na}^+ - \text{SO}_4^{2-}$ ; (j)  $\text{K}^+ - \text{Cl}^-$ ; (k)  $\text{K}^+ - \text{HCO}_3^-$ ; (l)  $\text{K}^+ - \text{SO}_4^{2-}$ . C2 and C3 – sampling points.

**9. Relationship between major ions in water samples collected from Cloșani Cave after the elimination of outliers caused by the seasonal variability**

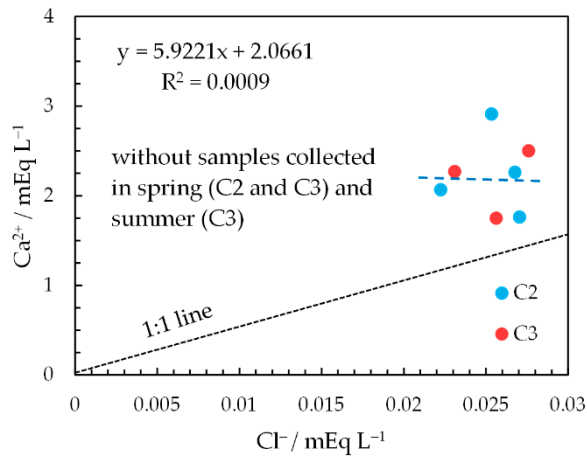

(a)

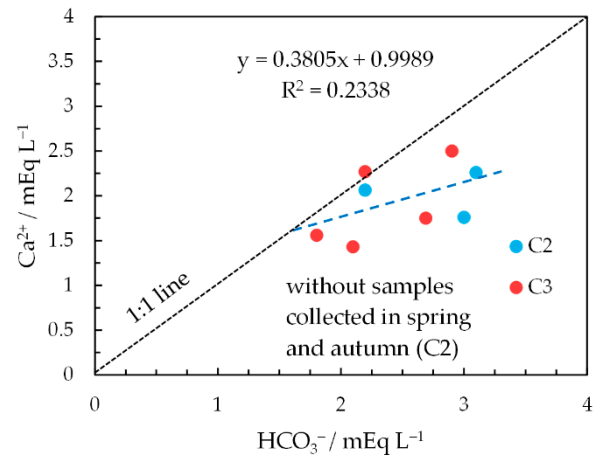

(b)

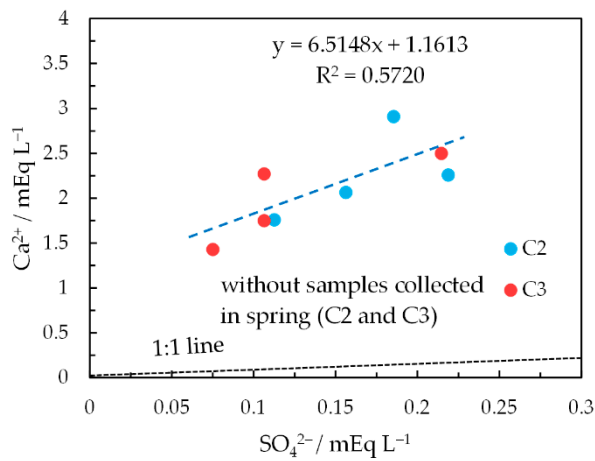

(c)

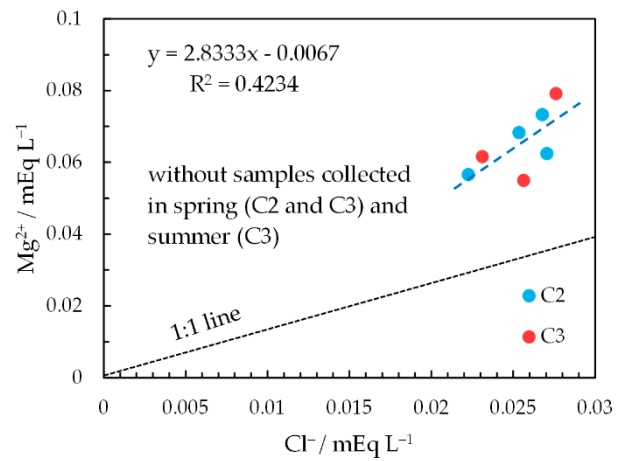

(d)

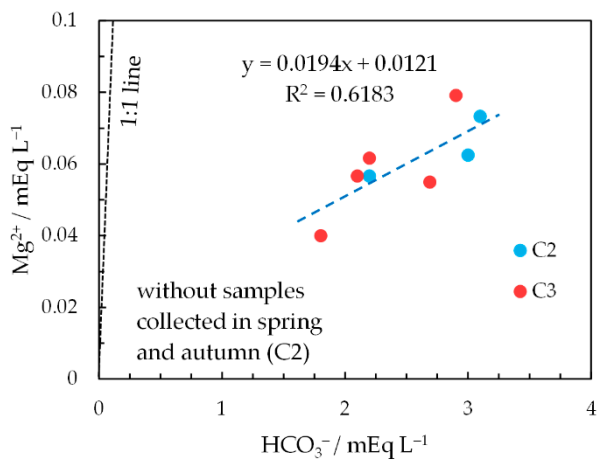

(e)

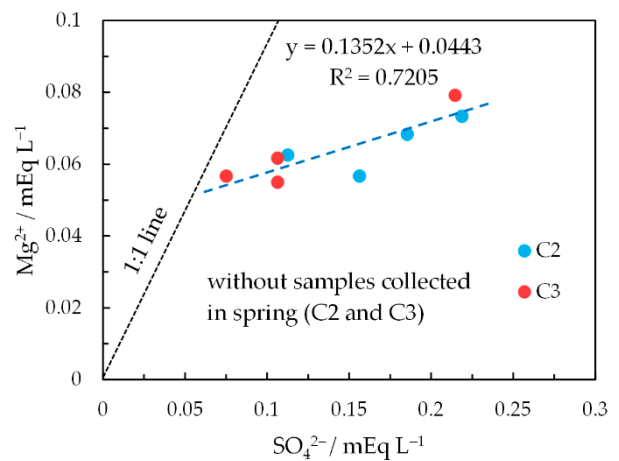

(f)

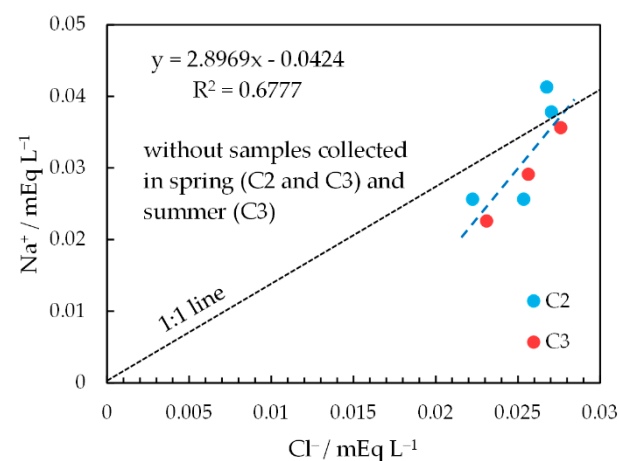

(g)

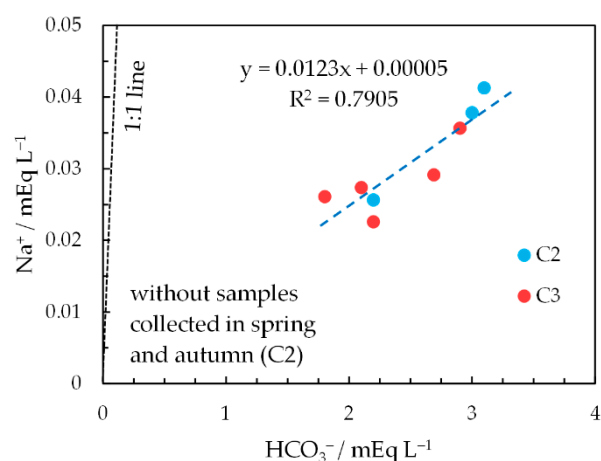

(h)

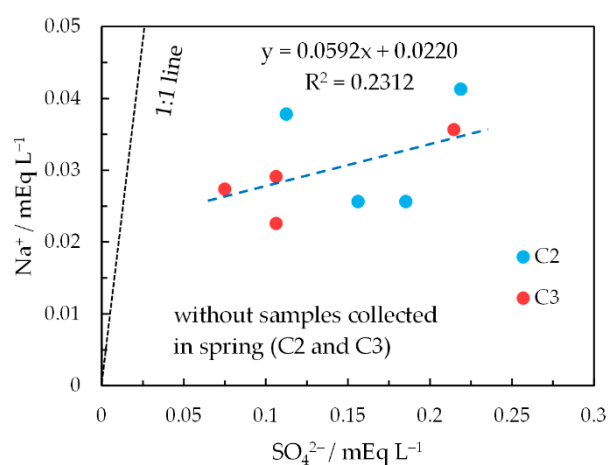

(i)

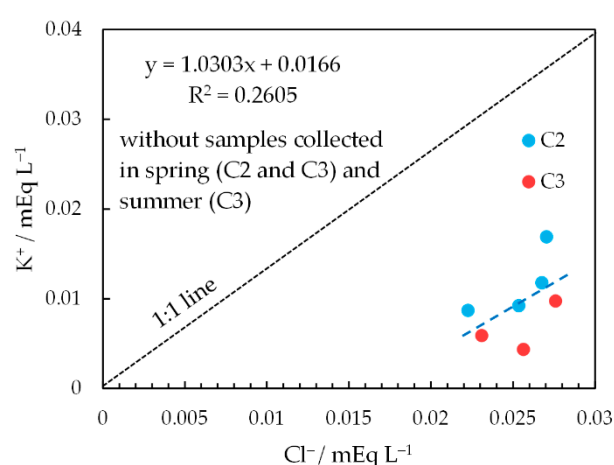

(j)

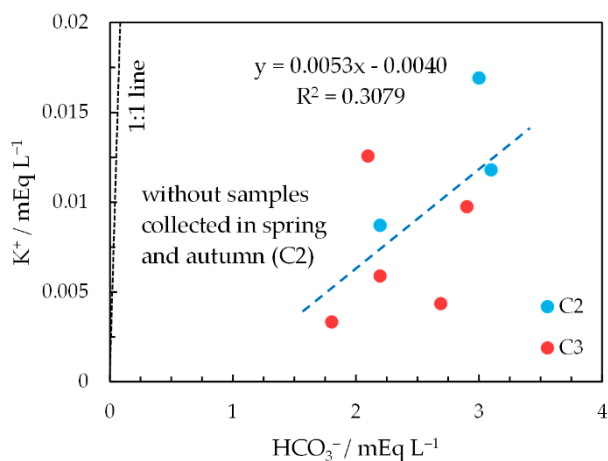

(k)

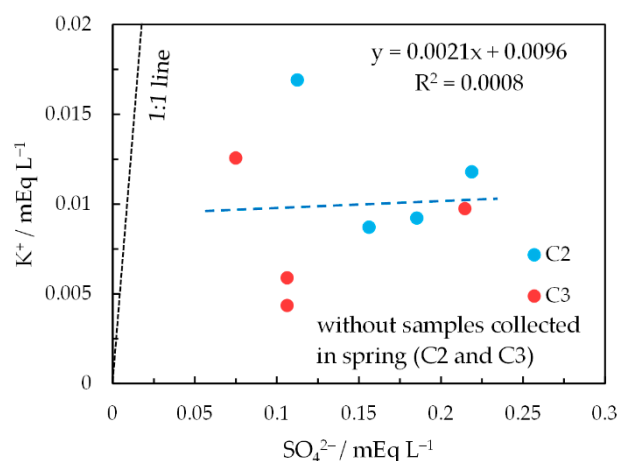

(l)

**Figure S2:** Relationship between major ions in water samples collected from Cloşani Cave after the elimination of outliers caused by the seasonal variability (a)  $\text{Ca}^{2+} - \text{Cl}^-$ ; (b)  $\text{Ca}^{2+} - \text{HCO}_3^-$ ; (c)  $\text{Ca}^{2+} - \text{SO}_4^{2-}$ ; (d)  $\text{Mg}^{2+} - \text{Cl}^-$ ; (e)  $\text{Mg}^{2+} - \text{HCO}_3^-$ ; (f)  $\text{Mg}^{2+} - \text{SO}_4^{2-}$ ; (g)  $\text{Na}^+ - \text{Cl}^-$ ; (h)  $\text{Na}^+ - \text{HCO}_3^-$ ; (i)  $\text{Na}^+ - \text{SO}_4^{2-}$ ; (j)  $\text{K}^+ - \text{Cl}^-$ ; (k)  $\text{K}^+ - \text{HCO}_3^-$ ; (l)  $\text{K}^+ - \text{SO}_4^{2-}$ . C2 and C3 – sampling points

**Author Contributions:** Investigation, data curation, A.I.T.; data curation, writing - original draft preparation, E.A.L.; investigation, S.C.; funding acquisition, project administration, resources, supervision, writing—review and editing, O.T.M.; investigation, data curation, validation, M.S.; investigation, methodology, O.C.; formal analysis, D.C.; investigation, data curation, methodology, S.B.A.; investigation, data curation, methodology, C.T.; formal analysis, visualization, writing - original draft preparation, E.C.; conceptualization, supervision, writing—review and editing, T.F. All authors have read and agreed to the published version of the manuscript.

**Funding:** This research was supported by a grant of the Ministry of Research, Innovation and Digitization, CNCS/CCCDI –UEFISCDI, project number 2/2019 (DARKFOOD), within PNCDI III. The APC was funded by the Ministry of Research, Innovation and Digitization, CNCS/CCCDI –UEFISCDI, project number 2/2019 (DARKFOOD), within PNCDI III. S.C. acknowledge the support of the EEA Financial Mechanism 2014-2021, through the Grant SEE 126/2019 (KARSTHIVES) (Contract # 3/2019).

**Institutional Review Board Statement:** Not applicable.

**Informed Consent Statement:** Not applicable.

**Data Availability Statement:** The data presented in this study is available on request from the corresponding author.

**Acknowledgments:** The authors would like to thank Ionut.Cornel Mirea, Ruxandra Năstase-Bucur and Cristian Sitar for their help with the samples collection.

**Conflicts of Interest:** The authors declare no conflict of interest. The funders had no role in the design of the study; in the collection, analyses, or interpretation of data; in the writing of the manuscript, or in the decision to publish the results.

**Sample Availability:** CRM samples are available from the manufacturer, while cave samples from the authors.
